# Supplementary material
Source: Springer Nature journal article supplement (https://www.springermedizin.de/resource/supplementary/12933_2012_513_MOESM2_ESM.pdf/9538678)

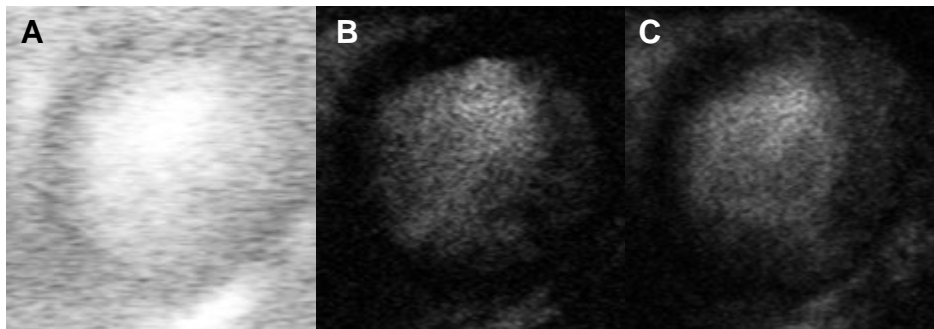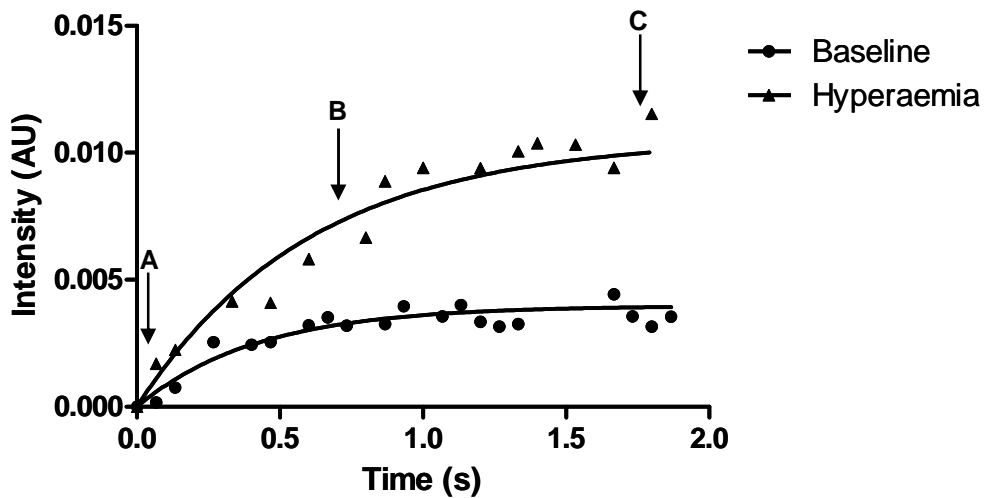

Supplement: MOESM2 [file 9538678]
